# Supplementary material for: Gender Differences in the VDR-FokI Polymorphism and Conventional Non-Genetic Risk Factors in Association with Lumbar Spine Pathologies in an Italian Case-Control Study
Source: MDPI journal article supplement (doi:10.3390/ijms16023722), 2015-02-09
Supplement: s1 [file s1]

## Supplementary Information

**Table S1.** Association of *VDR*-FokI genotypes with lumbar spine pathologies in total 521 subjects (254 controls and 267 cases) evaluated. Patients were subdivided in Subgroups 1 to 4 and A to D according to specific pathologic conditions Subgroup 1 = patients with disc herniation alone; Subgroup 2 = patients with discopathies and/or osteochondrosis associated with disc herniation; Subgroup 3 = patients with discopathies and/or osteochondrosis without herniation; and Subgroup 4 = patients with stenosis and/or spondilolysthesis. Subgroup A, Subgroup 1 grouped with Subgroup 2 (*i.e.*, all hernia cases with or without concomitant additional conditions); Subgroup B, Subgroup 2 grouped with Subgroup 3 (*i.e.*, all discopathies and/or osteochondrosis); Subgroup C, all discopathies cases with or without concomitant disc herniation; Subgroup D, all osteochondrosis cases with or without concomitant disc herniation

| Variables                            | <i>FF n</i> (%) | Crude OR<br>(95% CI) <i>p</i> Value  | Adjusted OR <sup>1</sup><br>(95% CI) <i>p</i> Value | <i>Ffn</i> (%) | Crude OR (95% CI)<br><i>p</i> Value  | Adjusted OR <sup>1</sup><br>(95% CI) <i>p</i> Value | <i>ff n</i> (%) | Crude OR (95% CI)<br><i>p</i> Value  | Adjusted OR <sup>1</sup><br>(95% CI) <i>p</i> Value |
|--------------------------------------|-----------------|--------------------------------------|-----------------------------------------------------|----------------|--------------------------------------|-----------------------------------------------------|-----------------|--------------------------------------|-----------------------------------------------------|
| Controls <i>n</i> = 254              | 101 (39.8)      | -                                    | -                                                   | 117 (46.1)     | -                                    | -                                                   | 36 (14.2)       | -                                    | -                                                   |
| Subgroup 1 <i>n</i> = 89             | 37 (41.6)       | 1.08 (0.66–1.76)                     | 0.96 (0.56–1.65)                                    | 40 (44.9)      | 0.96 (0.59–1.55)                     | 0.99 (0.58–1.69)                                    | 12 (13.5)       | 0.94 (0.47–1.91)                     | 1.09 (0.51–2.36)                                    |
| Subgroup 2 <i>n</i> = 87             | 49 (56.3)       | 1.95 (1.19–3.20)<br><i>p</i> = 0.007 | 2.09 (1.19–3.66)<br><i>p</i> = 0.011                | 32 (36.8)      | 0.68 (0.41–1.12)                     | 0.61 (0.35–1.08)<br><i>p</i> = 0.088                | 6 (6.9)         | 0.45 (0.18–1.11)<br><i>p</i> = 0.075 | 0.52 (0.19–1.41)                                    |
| Subgroup 3 <i>n</i> = 40             | 14 (35.0)       | 0.82 (0.41–1.64)                     | 0.74 (0.35–1.54)                                    | 23 (57.5)      | 1.58 (0.81–3.11)                     | 1.94 (0.94–4.00)<br><i>p</i> = 0.074                | 3 (7.5)         | 0.49 (0.14–1.68)                     | 0.37 (0.10–1.42)                                    |
| Subgroup 4 <i>n</i> = 51             | 17 (33.3)       | 0.76 (0.40–1.43)                     | 0.61 (0.30–1.22)                                    | 25 (49.0)      | 1.13 (0.62–2.06)                     | 1.18 (0.61–2.29)                                    | 9 (17.6)        | 1.30 (0.58–2.89)                     | 1.77 (0.73–4.32)                                    |
| Subgroup 1 + 2 + 3<br><i>n</i> = 216 | 100 (46.3)      | 1.31 (0.91–1.89)                     | 1.25 (0.84–1.88)                                    | 95 (44.0)      | 0.92 (0.64–1.32)                     | 0.93 (0.62–1.39)                                    | 21 (9.7)        | 0.65 (0.37–1.16)                     | 0.70 (0.37–1.32)                                    |
| Subgroup A <i>n</i> = 176            | 86 (48.9)       | 1.45 (0.98–2.13)<br><i>p</i> = 0.061 | 1.41 (0.91–2.18)                                    | 72 (40.9)      | 0.81 (0.55–1.20)                     | 0.78 (0.50–1.20)                                    | 18 (10.2)       | 0.69 (0.38–1.26)                     | 0.82 (0.42–1.61)                                    |
| Subgroup B <i>n</i> = 127            | 63 (49.6)       | 1.49 (0.97–2.29)<br><i>p</i> = 0.067 | 1.49 (0.93–2.40)<br><i>p</i> = 0.100                | 55 (43.3)      | 0.89 (0.58–1.37)                     | 0.91 (0.57–1.47)                                    | 9 (7.1)         | 0.46 (0.22–0.99)<br><i>p</i> = 0.043 | 0.42 (0.18–1.00)<br><i>p</i> = 0.051                |
| Subgroup C <i>n</i> = 64             | 37 (57.8)       | 2.08 (1.19–3.62)<br><i>p</i> = 0.009 | 1.88 (1.03–3.43)<br><i>p</i> = 0.039                | 22 (34.4)      | 0.61 (0.35–1.09)<br><i>p</i> = 0.092 | 0.65 (0.35–1.20)                                    | 5 (7.8)         | 0.51 (0.19–1.37)                     | 0.57 (0.20–1.61)                                    |
| Subgroup D <i>n</i> = 50             | 24 (48.0)       | 1.40 (0.76–2.57)                     | 1.50 (0.77–2.95)                                    | 24 (48.0)      | 1.08 (0.59–1.98)                     | 1.01 (0.51–1.97)                                    | 2 (4.0)         | 0.25 (0.06–1.08)<br><i>p</i> = 0.047 | 0.23 (0.05–1.17)<br><i>p</i> = 0.078                |

<sup>1</sup> Adjusted OR: multivariate analysis; OR adjusted for age; BMI, family history, smoking, physical job demand and exposure to vibrations; Only significant  $p \leq 0.05$  or tendency  $p \leq 0.10$  were indicated.

**Table S2.** Association of lumbar spine pathologies and *VDR*-FokI alleles. Patients were subdivided in Subgroups 1 to 4 and A to D according to specific pathologic conditions Subgroup 1=patients with disc herniation alone; Subgroup 2 = patients with discopathies and/or osteochondrosis associated with disc herniation; Subgroup 3 = patients with discopathies and/or osteochondrosis without herniation; Subgroup 4 = patients with stenosis and/or spondilolsthesis. Subgroup A, Subgroup 1 grouped with Subgroup 2 (*i.e.*, all hernia cases with or without concomitant additional conditions); Subgroup B, Subgroup 2 grouped with Subgroup 3 (*i.e.*, all discopathies and/or osteochondrosis); Subgroup C, all discopathies cases with or without concomitant disc herniation; Subgroup D, all osteochondrosis cases with or without concomitant disc herniation.

| Variables                         | <i>F n</i> (%) | Crude OR (95% CI)<br><i>p</i> Value | Adjusted OR <sup>1</sup> (95% CI)<br><i>p</i> Value | <i>f n</i> (%) | Crude OR (95% CI)<br><i>p</i> Value | Adjusted OR <sup>1</sup> (95% CI)<br><i>p</i> Value |
|-----------------------------------|----------------|-------------------------------------|-----------------------------------------------------|----------------|-------------------------------------|-----------------------------------------------------|
| Controls <i>n</i> = 508           | 319 (62.8)     | -                                   | -                                                   | 189 (37.2)     | -                                   | -                                                   |
| Subgroup 1 <i>n</i> = 178         | 114 (64.0)     | 1.06 (0.74–1.51)                    | 0.96 (0.65–1.41)                                    | 64 (36.0)      | 0.95 (0.66–1.35)                    | 1.04 (0.71–1.54)                                    |
| Subgroup 2 <i>n</i> = 174         | 130 (74.7)     | 1.75 (1.19–2.58) <i>p</i> = 0.004   | 1.76 (1.14–2.73) <i>p</i> = 0.011                   | 44 (25.3)      | 0.57 (0.39–0.84) <i>p</i> = 0.004   | 0.57 (0.37–0.88) <i>p</i> = 0.011                   |
| Subgroup 3 <i>n</i> = 80          | 51 (63.8)      | 1.04 (0.64–1.70)                    | 1.04 (0.62–1.74)                                    | 29 (36.3)      | 0.96 (0.59–1.57)                    | 0.96 (0.58–1.61)                                    |
| Subgroup 4 <i>n</i> = 102         | 59 (57.8)      | 0.81 (0.53–1.25)                    | 0.67 (0.42–1.08) <i>p</i> = 0.099                   | 43 (42.2)      | 1.23 (0.80–1.90)                    | 1.49 (0.93–2.41) <i>p</i> = 0.099                   |
| Subgroup 1 + 2 + 3 <i>n</i> = 432 | 295 (68.3)     | 1.28 (0.97–1.67) <i>p</i> = 0.078   | 1.23 (0.91–1.66)                                    | 137 (31.7)     | 0.78 (0.60–1.03) <i>p</i> = 0.078   | 0.81 (0.60–1.10)                                    |
| Subgroup A <i>n</i> = 352         | 244 (69.3)     | 1.34 (1.00–1.79) <i>p</i> = 0.048   | 1.27 (0.92–1.75)                                    | 108 (30.7)     | 0.75 (0.56–1.00) <i>p</i> = 0.048   | 0.79 (0.57–1.09)                                    |
| Subgroup B <i>n</i> = 254         | 181 (71.3)     | 1.47 (1.06–2.04) <i>p</i> = 0.020   | 1.49 (1.04–2.13) <i>p</i> = 0.032                   | 73 (28.7)      | 0.68 (0.49–0.94) <i>p</i> = 0.020   | 0.67 (0.47–0.97) <i>p</i> = 0.032                   |
| Subgroup C <i>n</i> = 128         | 96 (75.0)      | 1.78 (1.15–2.76) <i>p</i> = 0.010   | 1.64 (1.02–2.62) <i>p</i> = 0.040                   | 32 (25.0)      | 0.56 (0.36–0.87) <i>p</i> = 0.010   | 0.61 (0.38–0.98) <i>p</i> = 0.040                   |
| Subgroup D <i>n</i> = 100         | 72 (72.0)      | 1.52 (0.95–2.44) <i>p</i> = 0.079   | 1.57 (0.94–2.64) <i>p</i> = 0.086                   | 28 (28.0)      | 0.66 (0.41–1.05) <i>p</i> = 0.079   | 0.64 (0.38–1.07) <i>p</i> = 0.086                   |

<sup>1</sup> Adjusted OR: multivariate analysis; OR adjusted for age; BMI, family history, smoking, physical job demand and exposure to vibrations; Only significant  $p \leq 0.05$  or tendency  $p \leq 0.10$  were indicated.
